# Supplementary material
Source: Royal Society of Chemistry journal article supplement (doi:10.1039/d6va00126b)
Supplement: d6va00126b1.pdf [file d6va00126b1.pdf]

Supplementary Information for

**Manganese Peroxidase-Catalyzed Treatment of Aqueous Chlorophenols**

by S. Narimannejad, N. Biswas, E.E. Hood and K.E. Taylor

**Table S1** Treatment efficiencies of various substrates with SBP<sup>a</sup> in synthetic wastewater. (Narimannejad, 2025 and Haghghatnama et al., 2026).

| Substrate                     | Substrate concentration (mM) | SBP (U/mL)        | Normalized SBP (U/mL/mM) | Reference <sup>b</sup>                         |
|-------------------------------|------------------------------|-------------------|--------------------------|------------------------------------------------|
| <i>o</i> -cresol              | 1.0                          | 0.70              | 0.7                      |                                                |
| <i>m</i> -cresol              | 1.0                          | 0.80              | 0.8                      | Haghghatnama et al. 2026                       |
| <i>p</i> -cresol              | 1.0                          | 0.30              | 0.3                      |                                                |
| Phenol                        | 1.0                          | 0.90              | 0.9                      |                                                |
| 2-Chlorophenol                | 1.0                          | 0.23              | 0.23                     |                                                |
| 3-Chlorophenol                | 1.0                          | 0.65              | 0.65                     | (Caza et al., 1999)                            |
| 4-Chlorophenol                | 1.0                          | 0.20              | 0.2                      |                                                |
| 2,4-Dichlorophenol            | 1.0                          | 0.08              | 0.08                     |                                                |
| Bisphenol A                   | 0.5                          | 0.90              | 0.45                     |                                                |
| <i>p</i> -Anisidine           | 1.0                          | 0.0018            | 0.0018                   |                                                |
| CI Methyl Orange              | 0.5                          | 0.0070            | 0.014                    | Kaur et al. 2021                               |
| Acid blue 113                 | 1.0                          | 1.52              | 1.52                     |                                                |
| Direct black 38               | 0.5                          | 2.84              | 1.42                     | Cordova-Villegas et al. 2019                   |
| Diclofenac                    | 0.1                          | 0.15              | 1.5                      |                                                |
| Aceclofenac                   | 0.1                          | 0.6               | 6                        | Pishyar et al. 2025                            |
| Triclosan <sup>c</sup>        | 0.010                        | 0.10              | 10                       | Li et al. 2016                                 |
| Triclosan                     | 0.017                        | 0.05              | 2.9                      | Mashhadi et al. 2019b                          |
| Ioxynil                       | 0.1                          | 0.3               | 3.0                      |                                                |
| Bromoxynil                    | 0.5                          | 0.9               | 1.8                      | Zhang 2019                                     |
| Nonylphenol                   | 0.023                        | 0.003             | 0.13                     |                                                |
| Octylphenol                   | 0.024                        | 0.002             | 0.083                    |                                                |
| Estrone                       |                              |                   |                          | Mashhadi et al. 2019b                          |
| 17β-Estradiol                 | 0.039 each                   | 0.12 <sup>d</sup> | 3.1                      |                                                |
| 17α-ethynylestradiol          |                              |                   |                          |                                                |
| 3-Aminoquinoline              | 1.0                          | 4.5               | 4.5                      | Mashhadi et al. 2019a                          |
| Pyrrole                       | 1.0                          | 5.0               | 5                        |                                                |
| 1-Hydroxybenzotriazole        | 1.0                          | 0.13              | 0.13                     | Mashhadi et al. 2021                           |
| 3-Aminopyrazole               | 1.0                          | 3.0               | 3.0                      |                                                |
| Sulfamethoxazole              | 0.20                         | 4.0               | 20                       | Mashhadi et al. 2019b; Sharifzadeh et al. 2024 |
| Sulfamethoxazole <sup>c</sup> | 0.20                         | 0.10              | 0.5                      | Sharifzadeh et al. 2024                        |
| Sulfamerazine <sup>c</sup>    | 0.10                         | 0.05              | 0.5                      | Sharifzadeh et al. 2024                        |
| 4,4-Methylenedianiline        | 0.5                          | 0.7               | 1.4                      |                                                |
| 4,4-Thiodianiline             | 0.5                          | 0.15              | 0.3                      | Mukherjee et al. 2019                          |
| 3-Hydroxycoumarin             | 0.5                          | 0.002             | 0.004                    |                                                |
| 2-Aminobenzoxazole            | 0.1                          | 3.5               | 35                       | Ziayee Bideh et al. 2021                       |

<sup>a</sup> Except as noted, all substrates were tested with the same preparation of SBP, activity assay by AAP-phenol coupling method; normalized SBP comparison devised by Kaur et al., 2021.

<sup>b</sup> References listed after Table S2.

<sup>c</sup> SBP preparation from Bio-Research Products, activity assay substrate was ABTS.

<sup>d</sup> These compounds treated together at the given concentrations, the SBP requirement is nominally 0.03–0.04 U/mL each.

<sup>e</sup> With mediator, hydroxybenzotriazole at 1.5 molar equivalent.

**Table S2** Treatment initial kinetics of various SBP<sup>a</sup> substrates. (Haghighatnama et al., 2026).

| Substrate                            | SBP (U/mL) | Half-life (min) | Normalized half-life (min.U/mL) | Reference                    |                       |
|--------------------------------------|------------|-----------------|---------------------------------|------------------------------|-----------------------|
| <i>o</i> -cresol                     | 0.70       | 8.70 ± 0.07     | 6.09 ± 0.05                     | Haghighatnama et al. 2026    |                       |
| <i>m</i> -cresol                     | 0.80       | 1.8 ± 0.1       | 1.45 ± 0.09                     |                              |                       |
| <i>p</i> -cresol                     | 0.30       | 2.9 ± 0.3       | 0.86 ± 0.08                     |                              |                       |
| Diclofenac                           | 0.15       | 1.43 ± 0.01     | 0.22 ± 0.001                    | Pishyar et al. 2025          |                       |
| Acceclofenac                         | 0.60       | 0.84 ± 0.05     | 0.49 ± 0.03                     |                              |                       |
| Sulfamethoxazole                     | 4.0        | 0.804 ± 0.003   | 3.22 ± 0.01                     | Sharifzadeh et al. 2024      |                       |
| Sulfamerazine                        | 2.50       | 1.22 ± 0.01     | 3.05 ± 0.02                     |                              |                       |
| Pyrrole                              | 5.0        | 49 ± 3          | 246 ± 15                        | Mashhadi et al. 2021         |                       |
| Indole                               | 0.45       | 26 ± 1          | 11.3 ± 0.5                      |                              |                       |
| 2-Aminothiazole                      | 4.0        | 33.0 ± 0.6      | 132 ± 2                         |                              |                       |
| 2-Aminobenzothiazole                 | 4.50       | 720 ± 0.01      | 3240 ± 0.04                     |                              |                       |
| 4-Aminoantipyrine                    | 0.10       | 61 ± 1          | 6.1 ± 0.1                       |                              |                       |
| Hydroxybenzotriazole                 | 0.13       | 42 ± 2          | 4.97 ± 0.22                     |                              |                       |
| 2-Aminoimidazole                     | 1.50       | 5.1 ± 0.2       | 7.7 ± 0.3                       |                              |                       |
| 2-Amino-benzimidazole                | 3.0        | 29.4 ± 0.6      | 88 ± 2                          |                              |                       |
| 3-Aminopyrazole                      | 3.0        | 37 ± 1          | 108 ± 4                         |                              |                       |
| 3-Hydroxyquinoline                   | 0.10       | 11.9 ± 0.6      | 1.19 ± 0.06                     |                              | Mashhadi et al. 2019a |
| 3-Aminoquinoline                     | 4.50       | 15.0 ± 0.6      | 68 ± 3                          |                              |                       |
| 4,4'-Methylenebis (2-chlororaniline) | 0.10       | 4.08 ± 0.02     | 0.408 ± 0.002                   |                              | Mukherjee et al. 2020 |
| 4-Chloro- <i>o</i> -toluidine        | 0.009      | 11.5 ± 0.0      | 0.104 ± 0.0                     | Mukherjee et al. 2018        |                       |
| 4,4'-Oxydianiline                    | 0.01       | 1.80 ± 0.02     | 0.018 ± 0.0002                  |                              |                       |
| <i>p</i> -Cresidine                  | 0.04       | 12.4 ± 0.0      | 0.496 ± 0.0                     | Mukherjee et al. 2019        |                       |
| 4,4'-Thiodianiline                   | 0.15       | 0.513 ± 0.007   | 0.077 ± 0.001                   |                              |                       |
| 4,4'-Methylenedianiline              | 0.70       | 0.58 ± 0.10     | 0.40 ± 0.07                     |                              |                       |
| Bromoxynil                           | 0.90       | 3.00 ± 0.02     | 2.70 ± 0.02                     | Zhang 2019                   |                       |
| Ioxynil                              | 0.30       | 0.51 ± 0.01     | 0.153 ± 0.003                   | Ziayee Bideh et al. 2021     |                       |
| 3-Hydroxycoumarin                    | 0.002      | 12.4 ± 0.5      | 0.0257 ± 0.001                  |                              |                       |
| 2-Aminobenzoxazole                   | 3.50       | 129 ± 4         | 452 ± 14                        | Cordova Villegas et al. 2018 |                       |
| CI Acid Blue 113                     | 1.50       | 8.8 ± 0.6       | 13 ± 1                          |                              |                       |
| CI Direct Black 38                   | 0.75       | 2.1 ± 0.2       | 1.57 ± 0.15                     |                              |                       |
| <i>p</i> -Anisidine                  | 0.0018     | 5.5 ± 0.8       | 0.0097 ± 0.0010                 | Kaur et al. 2021             |                       |
| CI Methyl Orange                     | 0.007      | 7 ± 2           | 0.05 ± 0.01                     |                              |                       |

<sup>a</sup> all substrates tested with the same preparation of SBP; normalized half-life comparison devised by Ziayee Bideh et al., 2021.

## References for Tables S1 and S2

- Caza, N., Bewtra, J., Biswas, N., & Taylor, K. (1999). Removal of phenolic compounds from synthetic wastewater using soybean peroxidase. *Water Research*, 33(13), 3012-3018.
- Cordova Villegas LG, Mazloun S, Taylor KE, Biswas N (2018) Soybean peroxidase-catalyzed treatment of azo dyes with or without Fe<sup>o</sup> pretreatment. *Water Environ Res* 90(8):675–684. <https://doi.org/10.2175/106143017X15131012153149>
- Cordova-Villegas LG, Cordova-Villegas AY, Taylor KE, Biswas N (2019) Response surface methodology for optimization of enzyme-catalyzed azo dye decolorization. *J Environ Eng* 145(5):04019026. [https://doi.org/10.1061/\(ASCE\)EE.1943-7870.00015](https://doi.org/10.1061/(ASCE)EE.1943-7870.00015)
- Haghighatnama M, Narimannejad S, Biswas N, Taylor KE (2026) Biocatalytic treatment of cresols in aqueous solution with soybean peroxidase, *RSC Adv.*, 16, pp. 5079–5087. <https://doi.org/10.1039/d5ra08019c>
- Kaur A, Taylor KE, Biswas N (2021) Soybean peroxidase-catalyzed degradation of a sulfonated dye and its azo-cleavage product. *J Chem Technol Biotechnol* 96(2):423-430. <https://doi.org/10.1002/jctb.6555>
- Li J, Peng J, Zhang Y, Ji Y, Shi H, Mao L, Gao S (2016) Removal of triclosan via peroxidases-mediated reactions in water: reaction kinetics, products and detoxification. *J Hazard Mater* 310:152–160. <https://doi.org/10.1016/j.jhazmat.2016.02.037>
- Mashhadi N, Taylor KE, Biswas N, Meister P, Gauld JW (2019a) Oligomerization of 3-substituted quinolines by catalytic activity of soybean peroxidase as a wastewater treatment. Product formation and computational studies. *Chem Eng J* 364:340–348. <https://doi.org/10.1016/J.CEJ.2019.01.184>
- Mashhadi N, Taylor KE, Jimenez N, Varghese ST, Levi Y, Lonergan C, Lebeau E, Lamé M, Lard E, Biswas N (2019b) Removal of Selected Pharmaceuticals and Personal Care Products from Wastewater using Soybean Peroxidase. *Environ Manage* 63:408–415. doi: 10.1007/s00267-018-01132-9
- Mashhadi N, Taylor KE, Biswas N, Meister P, Gauld JW (2021) Biocatalytic oligomerization of azoles; experimental and computational studies. *Environ Sci: Water Res Technol* 7(6):1103-1113. <https://doi.org/10.1039/D1EW00079A>
- Mukherjee D, Taylor KE, Biswas N (2018) Soybean peroxidase-induced treatment of dye-derived arylamines in water. *Water Air Soil Pollut* 229:283. <https://doi.org/10.1007/s11270-018-3936-5>
- Mukherjee D, Bhattacharya S, Taylor KE, Biswas N (2019) Enzymatic treatment for removal of hazardous aqueous arylamines, 4,4'-methylenedianiline and 4,4'-thiodianiline. *Chemosphere* 235:365-372. <https://doi.org/10.1016/j.chemosphere.2019.06.182>
- Mukherjee D, Taylor KE, Biswas N (2020) Soybean peroxidase-catalyzed oligomerization of arylamines in water: optimization, kinetics, products and cost. *J Environ Chem Eng* 8(4):103871. <https://doi.org/10.1016/j.jece.2020.103871>
- Narimannejad S (2025). Treatment of Synthetic Wastewater Catalyzed by Manganese Peroxidase and Soybean Peroxidase University of Windsor (Canada).
- Pishyar S, Narimannejad S, Taylor KE, Biswas N (2025) Enzymatic removal of diclofenac and aceclofenac from water by soybean peroxidase. *Molecules* 30(8):1817. <https://doi.org/10.3390/molecules30081817>
- Sharifzadeh M, Narimannejad S, Taylor KE, Biswas N (2024) Enzymatic removal of sulfa drugs sulfamethoxazole and sulfamerazine from synthetic wastewater by soybean peroxidase. *Environ Sci Pollut Res* 31(56):64760–64771. <https://doi.org/10.1007/s11356-024-35578-8>

Zhang X (2019) Enzymatic treatment of selected pesticides in aqueous system. MASc thesis, University of Windsor, Windsor. <https://scholar.uwindsor.ca/etd/7857>

Ziayee Bideh N, Mashhadi N, Taylor KE, Biswas N (2021) Elimination of selected heterocyclic aromatic emerging contaminants from water using soybean peroxidase. *Environ Sci Pollut Res* 28:37570-37579. <https://doi.org/10.1007/s11356-021-13403-w>

**Table S3** Relative area ratios (%) for oligomers in enzymatic reaction mixture, directly or in aqueous-organic extract

|              | 2-CP, areas as % of total |            | 3-CP, areas as % of total |            | 4-CP, areas as % of total |            | 2,4-DCP, areas as % of total |            |
|--------------|---------------------------|------------|---------------------------|------------|---------------------------|------------|------------------------------|------------|
|              | Aqueous                   | Aq-organic | Aqueous                   | Aq-organic | Aqueous                   | Aq-organic | Aqueous                      | Aq-organic |
| dimer        | 54.7                      | 7.8        | 27.6                      | 16         | 77.5                      | 11         | -                            | 73.6       |
| dimer(-Cl-H) | -                         | -          | 4.9                       | 3.3        | 11.7                      | 0.1        | -                            | 0.1        |
| dimer(-Cl+H) | 5.8                       | -          | 1.1                       | -          | 7.8                       | 0.1        | -                            | 1.5        |
| trimer       | 39.4                      | 38.7       | 8.4                       | 18.3       | -                         | 25         | -                            | 16.8       |
| tetramer     | -                         | 22.4       | 18.3                      | 32.2       | 2.9                       | 41.7       | -                            | 5.7        |
| pentamer     | -                         | 17.8       | 18.6                      | 14.8       | -                         | 17.8       | -                            | 0.55       |
| hexamer      | -                         | 11.9       | 11.5                      | 8.5        | -                         | 3.4        | -                            | -          |
| heptamer     | -                         | 1.3        | 6.2                       | 4.1        | -                         | 0.35       | -                            | -          |
| octamer      | -                         | -          | 3.2                       | 2          | -                         | 0.4        | -                            | -          |
| nonamer      | -                         | -          | -                         | 0.5        | -                         | -          | -                            | -          |
| decamer      | -                         | -          | -                         | 0.2        | -                         | -          | -                            | -          |

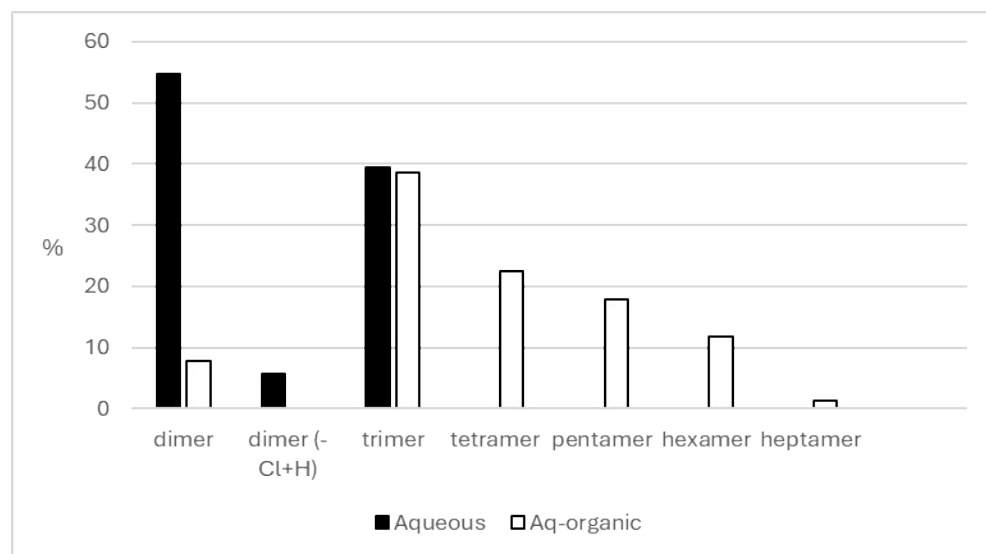

**Figure S1** Oligomer distribution for 2-CP in aqueous reaction mixture and in aqueous-organic extract. The enzymatic reaction mixture was filtered directly for the aqueous sample; for the extract, the reaction mixture was diluted 4-fold with acetonitrile, vortexed for an hour, then filtered. MS peak areas (all isomers) are expressed as a % of the total set of areas for that solvent (Table S3).

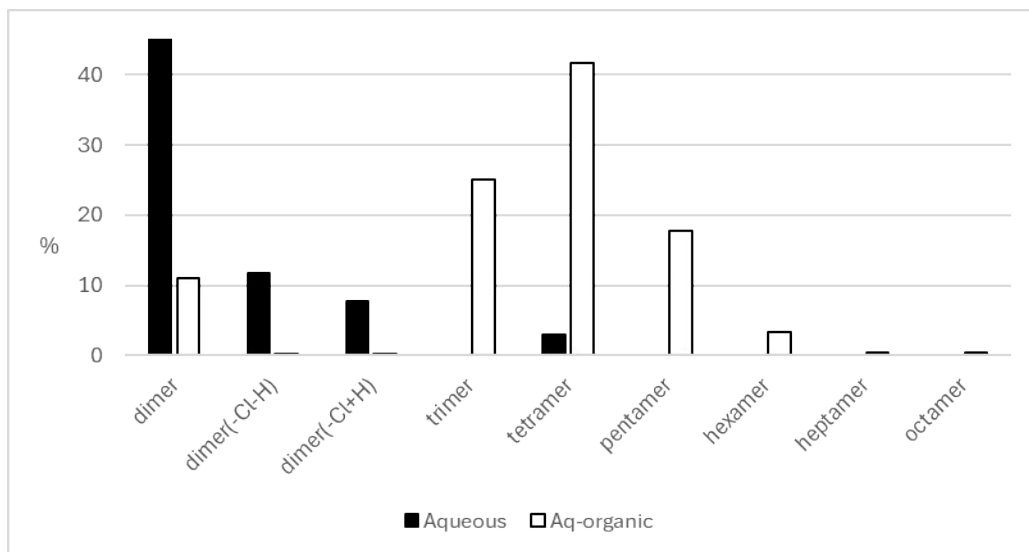

**Figure S2** Oligomer distribution for 4-CP in aqueous reaction mixture and in aqueous-organic extract. The enzymatic reaction mixture was filtered directly for the aqueous sample; for the extract, the reaction mixture was diluted 4-fold with acetonitrile, vortexed for an hour, then filtered. MS peak areas (all isomers) are expressed as a % of the total set of areas for that solvent (Table S3).

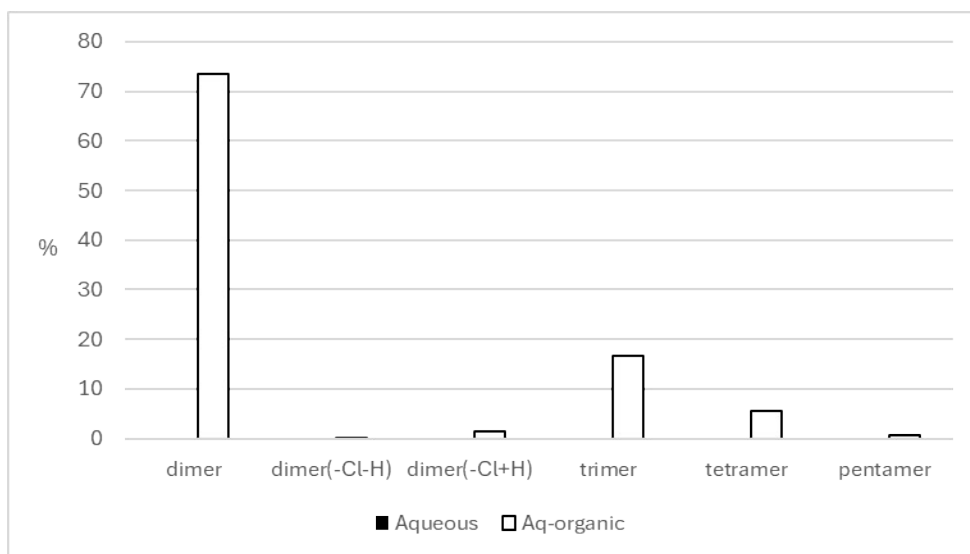

**Figure S3** Oligomer distribution for 2,4-CP in aqueous reaction mixture and in aqueous-organic extract. The enzymatic reaction mixture was filtered directly for the aqueous sample; for the extract, the reaction mixture was diluted 4-fold with acetonitrile, vortexed for an hour, then filtered. MS peak areas (all isomers) are expressed as a % of the total set of areas for that solvent (Table S3).
